# Supplementary material for: Inheritance of esters and other volatile compounds responsible for the fruity aroma in strawberry
Source: Front Plant Sci. 2022 Aug 12;13:959155. doi: 10.3389/fpls.2022.959155 (PMC9412188; doi:10.3389/fpls.2022.959155)
Supplement: Supplementary file 6 [file Table_1.XLSX]

## Sheet: Hoja1
Table 1. ‘FC50xFD54’ VOCs content. Relative average and standard deviation content of 58 VOCs detected in ‘FC50’, ‘FCD54’, and their F1 progeny in 6 harvests. VOCs name, KVCs mark, its abbreviation and compound family. Average, standard deviation and range of population and correlation between harvests in each VOC.
VOC	KVC	Abb.	Type	FC50	FD54	FC50xFD54		Correlation
				Mean ± SD	Mean ± SD	Mean ± SD	Range	Mean ± SD	Range
Butyl acetate	X	BA	Ester	0.092 ± 0.043	0.118 ± 0.058	0.104 ± 0.075	0.007 - 0.528	0.364 ± 0.106	0.198 - 0.586
Isopentyl acetate		IPA	Ester	0.042 ± 0.011	0.074 ± 0.061	0.065 ± 0.060	0.005 - 0.537	0.461 ± 0.097	0.238 - 0.666
Hexyl acetate	X	HA	Ester	0.152 ± 0.062	0.461 ± 0.385	0.332 ± 0.534	0.013 - 6.350	0.167 ± 0.155	-0.041 - 0.528
Octyl acetate		OA	Ester	0.026 ± 0.042	0.129 ± 0.103	0.045 ± 0.099	0.002 - 0.953	0.663 ± 0.108	0.415 - 0.807
Methyl butanoate	X	MB	Ester	2.938 ± 1.132	2.104 ± 0.605	3.507 ± 1.580	0.140 - 9.569	0.403 ± 0.117	0.237 - 0.549
Ethyl butanoate	X	EB	Ester	2.724 ± 1.837	1.630 ± 0.886	3.598 ± 3.182	0.064 - 21.773	0.234 ± 0.151	-0.049 - 0.447
Isopropyl butanoate		IPB	Ester	0.411 ± 0.122	0.417 ± 0.253	0.443 ± 0.292	0.012 - 1.445	0.376 ± 0.153	0.086 - 0.641
Methyl 3-methyl butanoate		M3MB	Ester	0.041 ± 0.013	0.126 ± 0.064	0.083 ± 0.060	0.011 - 0.438	0.555 ± 0.099	0.376 - 0.689
Propyl butanoate		PB	Ester	0.056 ± 0.029	0.056 ± 0.033	0.065 ± 0.048	0.003 - 0.262	0.358 ± 0.120	0.122 - 0.595
Butyl butanoate	X	BB	Ester	0.419 ± 0.205	0.511 ± 0.478	0.630 ± 0.705	0.002 - 4.076	0.570 ± 0.124	0.323 - 0.736
Hexyl butanoate		HB	Ester	0.073 ± 0.040	0.418 ± 0.509	0.239 ± 0.399	0.003 - 4.972	0.370 ± 0.201	0.032 - 0.726
Octyl butanoate		OB	Ester	0.031 ± 0.042	0.680 ± 0.718	0.380 ± 0.843	0.002 - 7.411	0.336 ± 0.291	-0.011 - 0.849
1-Methyloctyl butanoate		MOB	Ester	0.350 ± 0.690	0.040 ± 0.046	0.060 ± 0.226	0.001 - 3.183	0.132 ± 0.163	-0.091 - 0.405
Octyl 3-methylbutanoate		O3MB	Ester	0.004 ± 0.002	0.274 ± 0.275	0.046 ± 0.100	0.002 - 1.113	0.733 ± 0.106	0.528 - 0.937
Methyl 4-methylpentanoate		M4MP	Ester	0.017 ± 0.012	0.017 ± 0.017	0.024 ± 0.024	0.002 - 0.167	0.290 ± 0.131	0.060 - 0.532
Methyl hexanoate	X	MH	Ester	2.876 ± 1.078	2.961 ± 1.802	3.840 ± 2.258	0.028 - 12.808	0.503 ± 0.100	0.339 - 0.643
Ethyl hexanoate	X	EH	Ester	1.592 ± 1.552	1.777 ± 1.478	3.231 ± 3.626	0.009 - 20.876	0.326 ± 0.215	0.004 - 0.619
Isopropyl hexanoate		IPH	Ester	0.084 ± 0.030	0.116 ± 0.075	0.143 ± 0.145	0.002 - 1.186	0.627 ± 0.080	0.516 - 0.799
Isoamyl hexanoate		IAH	Ester	0.014 ± 0.007	0.021 ± 0.016	0.045 ± 0.063	0.001 - 0.419	0.632 ± 0.099	0.465 - 0.772
Hexyl hexanoate		HH	Ester	0.007 ± 0.003	0.101 ± 0.140	0.032 ± 0.048	0.003 - 0.372	0.368 ± 0.223	-0.038 - 0.754
Octyl hexanoate		OH	Ester	0.005 ± 0.002	0.202 ± 0.228	0.091 ± 0.248	0.002 - 2.833	0.589 ± 0.191	0.217 - 0.897
Methyl E-2-hexenoate		M2H	Ester	0.100 ± 0.039	0.054 ± 0.035	0.069 ± 0.063	0.003 - 0.388	0.539 ± 0.110	0.359 - 0.707
Ethyl 2-hexenoate		E2H	Ester	0.006 ± 0.004	0.010 ± 0.008	0.020 ± 0.031	0.002 - 0.381	0.174 ± 0.150	-0.072 - 0.467
Methyl octanoate		MO	Ester	0.062 ± 0.026	0.363 ± 0.310	0.206 ± 0.234	0.001 - 1.768	0.571 ± 0.091	0.390 - 0.754
Ethyl octanoate		EO	Ester	0.007 ± 0.005	0.036 ± 0.024	0.067 ± 0.142	0.001 - 1.273	0.296 ± 0.190	0.070 - 0.638
Methyl decanoate		MD	Ester	0.001 ± 0.000	0.023 ± 0.011	0.011 ± 0.013	0.001 - 0.097	0.479 ± 0.118	0.304 - 0.662
Methyl benzeneacetate		MBA	Ester	0.037 ± 0.011	0.081 ± 0.033	0.054 ± 0.031	0.007 - 0.266	0.449 ± 0.155	0.141 - 0.745
Methyl nicotinate		MN	Ester	0.038 ± 0.027	0.002 ± 0.002	0.016 ± 0.028	0.001 - 0.236	0.438 ± 0.130	0.161 - 0.649
Methyl salicylate		MS	Ester	0.090 ± 0.054	0.040 ± 0.032	0.090 ± 0.085	0.002 - 0.506	0.570 ± 0.091	0.376 - 0.706
Methyl anthranilate	X	MA	Ester	0.252 ± 0.252	0.009 ± 0.008	0.065 ± 0.180	0.001 - 1.752	0.423 ± 0.219	0.018 - 0.695
Z-3-hexenyl acetate	X	Z3HA	Ester	0.028 ± 0.024	0.039 ± 0.036	0.030 ± 0.019	0.004 - 0.134	0.156 ± 0.169	-0.186 - 0.349
E-2-hexenyl acetate	X	E2HA	Ester	0.069 ± 0.065	0.156 ± 0.192	0.166 ± 0.199	0.009 - 2.509	0.162 ± 0.161	-0.048 - 0.507
E-2-hexenyl butanoate		E2HB	Ester	0.032 ± 0.021	0.086 ± 0.159	0.105 ± 0.182	0.002 - 2.070	0.132 ± 0.159	-0.056 - 0.442
Hexanal		Hex	Aldehyde	0.144 ± 0.050	0.526 ± 0.266	0.353 ± 0.220	0.064 - 1.272	0.227 ± 0.179	-0.103 - 0.494
Heptanal		Hep	Aldehyde	0.026 ± 0.001	0.042 ± 0.008	0.043 ± 0.018	0.017 - 0.139	0.233 ± 0.119	0.061 - 0.408
Nonanal		Non	Aldehyde	0.230 ± 0.051	0.166 ± 0.103	0.209 ± 0.153	0.007 - 1.070	0.283 ± 0.145	0.075 - 0.498
Decanal		Dec	Aldehyde	0.011 ± 0.007	0.043 ± 0.062	0.021 ± 0.023	0.003 - 0.315	0.065 ± 0.158	-0.111 - 0.491
E-2-Hexenal	X	E2Hal	Aldehyde	1.990 ± 0.521	2.290 ± 1.430	1.865 ± 1.434	0.064 - 9.109	0.208 ± 0.128	-0.051 - 0.430
Z-2-Heptenal		Z2H	Aldehyde	0.024 ± 0.002	0.048 ± 0.019	0.048 ± 0.018	0.014 - 0.121	0.206 ± 0.133	-0.088 - 0.403
Benzaldehyde		B	Aldehyde	0.154 ± 0.122	0.187 ± 0.150	0.200 ± 0.160	0.007 - 1.260	0.288 ± 0.141	0.052 - 0.511
Dodecane		Dode	Alkane	0.039 ± 0.042	0.011 ± 0.010	0.029 ± 0.056	0.001 - 1.017	0.190 ± 0.239	-0.054 - 0.538
Octanoic acid		Oac	Acid	0.074 ± 0.072	0.203 ± 0.209	0.176 ± 0.312	0.003 - 2.936	0.600 ± 0.151	0.297 - 0.828
Octanol		Ool	Alcohol	0.082 ± 0.063	0.071 ± 0.049	0.068 ± 0.053	0.009 - 0.386	0.314 ± 0.184	0.047 - 0.572
2-Heptanone		Hep2	Ketone	0.156 ± 0.083	0.291 ± 0.268	0.169 ± 0.146	0.010 - 1.293	0.560 ± 0.139	0.333 - 0.792
γ-octalactone		GO	Lactone	0.004 ± 0.004	0.043 ± 0.030	0.023 ± 0.021	0.001 - 0.180	0.553 ± 0.086	0.340 - 0.691
γ-decalactone	X	GD	Lactone	0.046 ± 0.063	4.046 ± 2.068	2.720 ± 1.901	0.001 - 14.162	0.409 ± 0.093	0.230 - 0.565
γ-dodecalactone		GDo	Lactone	0.124 ± 0.189	0.292 ± 0.398	0.195 ± 0.288	0.001 - 1.591	0.446 ± 0.117	0.249 - 0.628
Mesifurane	X	M	Furan	3.375 ± 1.271	1.828 ± 1.410	2.419 ± 2.242	0.023 - 13.937	0.361 ± 0.222	0.040 - 0.710
Furaneol	X	F	Furan	0.280 ± 0.087	0.111 ± 0.079	0.118 ± 0.144	0.006 - 1.018	0.369 ± 0.137	0.082 - 0.574
β-Pinene		BP	Terpene	0.096 ± 0.079	0.278 ± 0.127	0.199 ± 0.162	0.001 - 1.002	0.746 ± 0.078	0.579 - 0.867
D-Limonene		DL	Terpene	0.035 ± 0.030	0.115 ± 0.054	0.080 ± 0.063	0.002 - 0.415	0.653 ± 0.100	0.480 - 0.851
α-Terpineol		AT	Terpene	0.076 ± 0.057	0.375 ± 0.186	0.171 ± 0.162	0.002 - 1.242	0.559 ± 0.155	0.223 - 0.770
Linalool	X	L	Terpene	0.854 ± 0.395	2.421 ± 0.691	1.488 ± 0.919	0.010 - 5.554	0.732 ± 0.093	0.531 - 0.867
Geraniol		G	Terpene	0.002 ± 0.001	0.008 ± 0.006	0.004 ± 0.005	0.000 - 0.034	0.594 ± 0.178	0.207 - 0.837
β-Farnesene		BF	Terpene	0.161 ± 0.182	0.414 ± 0.338	0.296 ± 0.278	0.003 - 1.460	0.615 ± 0.093	0.420 - 0.750
α-Curcumene		AC	Terpene	0.032 ± 0.044	0.063 ± 0.073	0.052 ± 0.064	0.001 - 0.403	0.608 ± 0.095	0.377 - 0.739
α-Farnesene		AF	Terpene	0.096 ± 0.097	0.292 ± 0.217	0.203 ± 0.191	0.003 - 1.268	0.595 ± 0.090	0.426 - 0.757
Nerolidol	X	N	Terpene	0.382 ± 0.300	0.962 ± 0.670	0.603 ± 0.529	0.003 - 2.706	0.602 ± 0.107	0.397 - 0.772
